# Supplementary material for: Adenovirus Infections in African Humans and Wild Non-Human Primates: Great Diversity and Cross-Species Transmission
Source: MDPI journal article supplement (doi:10.3390/v12060657), 2020-06-18
Supplement: s1 [file s1]

**Table S2.** Mbou024gene annotation and comparison to other related *Human mastadenovirus D* types

[illegible]

|    |             |       |       |       |       |       |       |       |       |       |       |
|----|-------------|-------|-------|-------|-------|-------|-------|-------|-------|-------|-------|
|    | 22835-23293 | 95.86 | 99.13 | 97.84 | 97.19 | 98.27 | 98.05 | 99.13 | 97.19 | 96.51 | 95.64 |
|    | 23369-26089 | 96.88 | 97.87 | 96.33 | 96.70 | 96.00 | 96.11 | 98.13 | 97.10 | 96.11 | 96.29 |
| E3 | 26090-28741 | 95.21 | 94.86 | 87.75 | 88.43 | 90.62 | 86.98 | 91.95 | 95.57 | 86.82 | 88.28 |
|    | 29139-30194 | 93.82 | 95.68 | 91.85 | 92.43 | 92.29 | 93.63 | 92.98 | 94.25 | 92.39 | 91.66 |
|    | 30298-30680 | 99.22 | 98.4  | 97.91 | 98.96 | 98.43 | 99.22 | 98.69 | 99.21 | 98.69 | 98.69 |
| U  | 30760-30909 | 98.00 | 97.33 | 94.67 | 98.00 | 98.00 | 96.67 | 98.00 | 98.00 | 97.33 | 96.67 |
| L5 | 30925-31147 | 94.95 | 95.52 | 95.00 | 96.12 | 97.14 | 94.62 | 96.86 | 95.93 | 93.27 | 95.00 |
| E4 | 32061-34636 | 94.41 | 94.14 | 94.17 | 94.14 | 95.89 | 94.92 | 96.82 | 94.64 | 92.93 | 94.41 |
