# Supplementary material for: Adenovirus Infections in African Humans and Wild Non-Human Primates: Great Diversity and Cross-Species Transmission
Source: MDPI journal article supplement (doi:10.3390/v12060657), 2020-06-18
Supplement: s1 [file s1]

**Table S1.** Adenoviruses identified in the present study in African humans and NHPs (sequences of  $\approx 250$  bps DNA polymerase gene) and their identity with GenBank reference sequences.

| Code    | Species                | Origine    | Best Blastn GenBank                              | % Identity | % Cover | Type |
|---------|------------------------|------------|--------------------------------------------------|------------|---------|------|
| GC01    | <i>Macaca sylvanus</i> | Algeria    | FJ025922.1 SAdV38                                | 98         | 100     | E    |
| GC08    | <i>Macaca sylvanus</i> | Algeria    | FJ025922.1 SAdV38                                | 98         | 100     | E    |
| GC11    | <i>Macaca sylvanus</i> | Algeria    | FJ025922.1 SAdV38                                | 100        | 100     | E    |
| RS04    | <i>Macaca sylvanus</i> | Algeria    | FJ025922.1 SAdV38                                | 100        | 99      | E    |
| RS13    | <i>Macaca sylvanus</i> | Algeria    | FJ025922.1 SAdV38                                | 100        | 99      | E    |
| TE01    | <i>Macaca sylvanus</i> | Algeria    | FJ025922.1 SAdV38                                | 99.5       | 99      | E    |
| TE02    | <i>Macaca sylvanus</i> | Algeria    | FJ025922.1 SAdV38                                | 100        | 99      | E    |
| G1      | <i>Gorilla gorilla</i> | Rep. Congo | FJ025922.1 SAdV38                                | 100        | 100     | E    |
| G11     | <i>Gorilla gorilla</i> | Rep. Congo | KC702817.1 Gorilla b. graueri AdV 8 isolate GC45 | 97.6       | 100     | C    |
| CHS03   | <i>Pan troglodytes</i> | Senegal    | FJ025927.1 SAdV41.2                              | 97.1       | 100     | B    |
| CHS11   | <i>Pan troglodytes</i> | Senegal    | FJ025922.1 SAdV38                                | 98.7       | 100     | E    |
| CHS18   | <i>Pan troglodytes</i> | Senegal    | FJ025922.1 SAdV38                                | 100        | 100     | E    |
| CHS20   | <i>Pan troglodytes</i> | Senegal    | FJ025922.1 SAdV38                                | 99.5       | 100     | E    |
| CHS28   | <i>Pan troglodytes</i> | Senegal    | FJ025922.1 SAdV38                                | 100        | 100     | E    |
| CHS43   | <i>Pan troglodytes</i> | Senegal    | FJ025922.1 SAdV38                                | 100        | 100     | E    |
| CHS25   | <i>Pan troglodytes</i> | Senegal    | FJ025922.1 SAdV38                                | 100        | 100     | E    |
| CHS27   | <i>Pan troglodytes</i> | Senegal    | FJ025922.1 SAdV38                                | 100        | 100     | E    |
| CHS32   | <i>Pan troglodytes</i> | Senegal    | FJ025922.1 SAdV38                                | 100        | 100     | E    |
| CHS44   | <i>Pan troglodytes</i> | Senegal    | FJ025922.1 SAdV38                                | 100        | 100     | E    |
| Bab 1   | <i>Papio hamadryas</i> | Djibouti   | FJ025922.1 SAdV38                                | 100        | 100     | E    |
| G06     | <i>Gorilla gorilla</i> | Rep. Congo | FJ025903.1 SAdV42.1                              | 99.5       | 100     | C    |
| G10     | <i>Gorilla gorilla</i> | Rep. Congo | LC504573.1 HAdV-C K67-339                        | 100        | 100     | C    |
| G02A    | <i>Gorilla gorilla</i> | Rep. Congo | FJ025903.1 SAdV42.1                              | 99.4       | 99      | C    |
| G04A    | <i>Gorilla gorilla</i> | Rep. Congo | FJ025903.1 SAdV42.1                              | 100        | 100     | C    |
| G07A    | <i>Gorilla gorilla</i> | Rep. Congo | FJ025903.1 SAdV42.1                              | 99.5       | 100     | C    |
| Ibou01A | <i>Human</i>           | Rep. Congo | FJ025903.1 SAdV42.1                              | 99.5       | 100     | C    |

|                |              |            |                                                                 |      |     |   |
|----------------|--------------|------------|-----------------------------------------------------------------|------|-----|---|
| <b>Mbou25</b>  | <i>Human</i> | Rep. Congo | FJ025903.1 SAdV42.1                                             | 99.5 | 100 | C |
| <b>Mbou058</b> | <i>Human</i> | Rep. Congo | FJ025903.1 SAdV42.1                                             | 99.5 | 100 | C |
| <b>Mbou024</b> | <i>Human</i> | Rep. Congo | KF268200.1 HAdV-D strain<br>human/USA/UFL/2005[P-NEW/H45/F-NEW] | 98   | 100 | D |
